# Supplementary material for: Transcriptional adaptation of pneumococci and human pharyngeal cells in the presence of a virus infection
Source: PubMed Central journal article supplement (PMC3681581; doi:10.1186/1471-2164-14-378), 2013-06-07

**Table S1 Primers used for qRT-PCR analysis of human genes.**

| <b>Locus</b> | <b>F-Primer</b>          | <b>R-Primer</b>           | <b>Prod Size</b> |
|--------------|--------------------------|---------------------------|------------------|
| T64956       | ATATTCAGCCTTGCCCTGAG     | GCTTAAGAGTGGCTTTCTAGGC    | 146              |
| R72244       | TTTAAGGCTAAAGCCCAAGG     | CAAGCTCTCCAAAGGCTCAG      | 146              |
| AA406020     | TCCTGGTGAGGAATAACAAGGG   | GTCAGCCAGAACAGGTCGTC      | 124              |
| T72877       | AAACAGAGCTGAAGTCACAGGA   | TGTAGAGCTTCTGGCACTTGGGA   | 198              |
| AA432030     | TAGGCAGGAGTCCAGAGGAG     | ACAGCTCCTGGAACACAACC      | 153              |
| AI066560     | AAGGGCGGGCTATACTAAGG     | GTGGAGGTGATGATCAGTGC      | 100              |
| AA401724     | TGGGATCCCTACTCCTCTTG     | AAGGAAGGAGACCAGGAAGC      | 175              |
| W86214       | TCAGGTGACACTTCGGTGAC     | TTGTGGGTAGATCCCTCTCG      | 125              |
| AI244834     | CTGGTCTTGCTTCAGTGTGC     | GAAAGAGGCGGACAGATGAG      | 109              |
| H93482       | GGAAAATCTGATTCCAGCATTC   | AGAGCCTGGACCCATGTAAG      | 191              |
| AA973391     | AGGGCTGATTGCAAATGAAG     | CAGGTGCCAGAGCAAGAGTC      | 137              |
| AA931124     | CGACTCCTCTAAGGGCAAAC     | TGGATGCATTGTACCATAGGC     | 121              |
| AI246160     | CGTAGACATACCTACCCATTCTTG | CAGCTCAGATCCCGCATATC      | 126              |
| AA679571     | AACTGGCTGGAATGTGCTG      | ATCAGTTGCCACTCGGATG       | 144              |
| AA664101     | GGACAATGCTGTTGAATTTGC    | CAAATCATCATAAATTGATTCTTCC | 107              |
| AA402898     | TTTGAGCGTCGCAGAGAACTT    | TGTCCCAAGGATTCTTCCTCC     | 173              |
| AA034945     | AAGGCAAGAACAAATGATTAC    | TTTCAGATATCCAAAGCTTACCAC  | 103              |
| H92621       | ACCTGTCAAGTACCCAAGACT    | CGAGGACCACTTAACCTCCAG     | 108              |
| AA970731     | CTTCCCTGCTCCAAGTTCTG     | ACTGCTGCATCTTGGGTCTC      | 115              |
| AA436384     | GTGTCTACTCCAGGCCAAGC     | GAGCCAGAGCTTGGTGTCTC      | 131              |
| AA969184     | AGTAGAGGAACTGGTCACTGG    | TGGGCTAGAAGTGTCTTCAGAT    | 138              |
| AA442095     | AAATTTGAGTTCTGATGAAATGC  | ACTGCGGGACAGTCAGTAGG      | 149              |
| R55786       | CATTTAATCATTTGCTGTTCCAAG | CCAAATTGTTGCATCTGGTTC     | 171              |
| AA447746     | GGGATCACTTGGGATCTTTG     | AGACCCAGATGGCACTCCTC      | 153              |
| AA425379     | CACTGGCATTTACAATCCTTTT   | CCTGGAGACCCTGTCACATC      | 150              |
| AI340216     | AATTATGGCTGGGTGTGGTG     | TGGTGTGATCATGGCTTATTTT    | 114              |
| AI128885     | CATCTGCTTCCAACCTCTCC     | GGACAAGCAGGCGAATTAAG      | 168              |
| AI188107     | TACTTCCTCACCGGGATGTC     | TTTACCACATGGCACAATC       | 190              |
| NG_007992    | CACTCATTCAACAGCGAGGA     | GTTTTAGCCTCTGCAGCCAC      | 166              |

**Table S2 Primers used for qRT-PCR analysis of pneumococcal genes.**

| <b>Locus</b>                      | <b>F-Primer</b>        | <b>R-Primer</b>         | <b>Prod Size</b> |
|-----------------------------------|------------------------|-------------------------|------------------|
| SP_0204                           | GGCTACTCCATTCTGTCATC   | ATAACGCTCGACTCCATTGC    | 195              |
| SP_0205                           | TGGCATTCCCTATACAGCAG   | CTTGTCTGGCAATTCCTTCC    | 157              |
| SP_0206                           | TGGGAATATACGGTCATGGAG  | GCAAACCTCTCCAGTTCATGC   | 198              |
| SP_1242                           | ATTGGGAATGGAGTTGCTTG   | TCAAGGGCAGAAGTTGGTTC    | 159              |
| SP_1428                           | TGATAGAGGCACAGGGTTTC   | TGAATCATGACACCGATAACAAG | 131              |
| SP_1765                           | TTTGGATTGGTCAGAGATTGC  | AGAACAATCACACGGTGCAG    | 178              |
| SP_1767                           | GAAGGTGCGACTTCTCGTTC   | CAAGCGACCACCAGCATAC     | 147              |
| SP_2005                           | CCTTTCAACCACTCCATTCTC  | TTATCGGCCTGTCACTCTTG    | 148              |
| <b>Controls for normalization</b> |                        |                         |                  |
| SP_2135                           | AACACAAAGAATCTGGTGAACG | AACACAACGTGTTTGCGAAG    | 112              |
| SP_0002                           | TTCCTAGCCGTTCTCTACGC   | TGTTGGAATCAAGCGATCTG    | 167              |

**Table S3 Genes commonly significantly regulated by TIGR4 in contact with either viral- or mock-infected human nasopharyngeal cells.** The ratio index is the ratio between “TIGR4 viral infected/TIGR4 in culture medium” and “TIGR4 mock-infected/TIGR4 in culture medium”. A ratio index of 1 indicates that the gene expression ratio was the same in both conditions.

| Up-regulated genes |                                                              | Fold change |                                                 |                                                  | Ratio Index |
|--------------------|--------------------------------------------------------------|-------------|-------------------------------------------------|--------------------------------------------------|-------------|
| Locus              | Common name                                                  | Gene symbol | TIGR4 mock-infected/<br>TIGR4 in culture medium | TIGR4 viral infected/<br>TIGR4 in culture medium |             |
| SP_0099            | Hypothetical protein                                         |             | 2.2                                             | 1.7                                              | 0.77        |
| SP_0100            | Hypothetical protein                                         |             | 2.2                                             | 1.6                                              | 0.73        |
| SP_0102            | Glycosyl transferase                                         |             | 1.9                                             | 2.2                                              | 1.16        |
| SP_0103            | Putative capsular polysaccharide biosynthesis protein        |             | 1.6                                             | 1.5                                              | 0.94        |
| SP_0371            | Hypothetical protein                                         |             | 2                                               | 2.1                                              | 1.05        |
| SP_0421            | 3-oxoacyl-[acyl-carrier protein] reductase                   |             | 2.7                                             | 1.5                                              | 0.56        |
| SP_0422            | 3-oxoacyl-(acyl-carrier-protein) synthase II                 | <i>fabF</i> | 2.4                                             | 1.9                                              | 0.79        |
| SP_0423            | Hypothetical protein                                         |             | 3.6                                             | 1.9                                              | 0.53        |
| SP_0424            | Putative hydroxymyristoyl-(acyl carrier protein) dehydratase |             | 3.6                                             | 2                                                | 0.56        |
| SP_0425            | Acetyl-coa carboxylase, biotin carboxylase                   |             | 4.2                                             | 2.3                                              | 0.55        |
| SP_0426            | Acetyl-coa carboxylase, carboxyl transferase subunit beta    | <i>accD</i> | 5.5                                             | 3                                                | 0.55        |
| SP_0427            | Acetyl-coa carboxylase, carboxyl transferase subunit alpha   | <i>accA</i> | 2.5                                             | 1.6                                              | 0.64        |
| SP_0461            | Transcriptional regulator, putative                          |             | 2.1                                             | 2.7                                              | 1.29        |
| SP_0462            | Cell wall surface anchor family protein                      |             | 2.6                                             | 2.2                                              | 0.85        |
| SP_0463            | Cell wall surface anchor family protein                      |             | 1.9                                             | 2.2                                              | 1.16        |
| SP_0464            | Cell wall surface anchor family protein                      |             | 2.1                                             | 2                                                | 0.95        |
| SP_0466            | Sortase, putative                                            |             | 2.0                                             | 2.5                                              | 1.25        |
| SP_0467            | Sortase, putative                                            |             | 2.3                                             | 2.3                                              | 1.00        |
| SP_0468            | Sortase, putative                                            |             | 2.2                                             | 2.3                                              | 1.05        |

## Up-regulated genes

| Locus   | Common name                                                                 | Gene symbol  | Fold change                                        |                                                     | Ratio Index |
|---------|-----------------------------------------------------------------------------|--------------|----------------------------------------------------|-----------------------------------------------------|-------------|
|         |                                                                             |              | TIGR4 mock-infected/<br>TIGR4 in culture<br>medium | TIGR4 viral infected/<br>TIGR4 in culture<br>medium |             |
| SP_0696 | Hypothetical protein                                                        |              | 2.1                                                | 1.4                                                 | 0.67        |
| SP_0697 | ABC transporter, ATP-binding protein, authentic point mutation              |              | 1.8                                                | 1.5                                                 | 0.83        |
| SP_0879 | Hypothetical protein                                                        |              | 2                                                  | 2.1                                                 | 1.05        |
| SP_1261 | Hypothetical protein                                                        |              | 1.5                                                | 1.4                                                 | 0.93        |
| SP_1267 | LicC protein                                                                | <i>licC</i>  | 4                                                  | 1.7                                                 | 0.43        |
| SP_1268 | LicB protein                                                                | <i>licB</i>  | 4                                                  | 1.9                                                 | 0.48        |
| SP_1269 | Choline kinase                                                              |              | 3.1                                                | 2                                                   | 0.65        |
| SP_1270 | Hypothetical protein                                                        |              | 3.1                                                | 2.1                                                 | 0.68        |
| SP_1272 | Repeating unit transporter                                                  |              | 1.6                                                | 1.4                                                 | 0.88        |
| SP_1273 | LicD1                                                                       | <i>licD1</i> | 1.3                                                | 1.4                                                 | 1.08        |
| SP_1274 | LicD2                                                                       | <i>licD2</i> | 1.4                                                | 1.3                                                 | 0.93        |
| SP_1294 | Hypothetical protein                                                        |              | 2                                                  | 1.6                                                 | 0.80        |
| SP_1295 | Hypothetical protein                                                        | <i>crcB</i>  | 1.8                                                | 1.5                                                 | 0.83        |
| SP_1296 | Purtative chorismate mutase protein                                         |              | 1.9                                                | 1.6                                                 | 0.84        |
| SP_1429 | YrrO protein                                                                | <i>yrrO</i>  | 2.1                                                | 2                                                   | 0.95        |
| SP_1648 | Manganese ABC transporter, ATP-binding protein                              | <i>psaB</i>  | 2.8                                                | 2.2                                                 | 0.79        |
| SP_1649 | Manganese ABC transporter, permease protein, putative, authentic frameshift | <i>psaC</i>  | 2.4                                                | 1.3                                                 | 0.54        |
| SP_1650 | Manganese ABC transporter, manganese-binding adhesion liprotein             | <i>psaA</i>  | 2                                                  | 1.6                                                 | 0.80        |
| SP_1758 | Glycosyl transferase, group 1                                               |              | 2.2                                                | 1.6                                                 | 0.73        |
| SP_1770 | Glycosyl transferase, family 8                                              |              | 2.2                                                | 1.8                                                 | 0.82        |
| SP_1771 | Glycosyl transferase, family 2-glycosyl transferase family 8                |              | 1.8                                                | 1.7                                                 | 0.94        |
| SP_1811 | Tryptophan synthase, alpha subunit                                          |              | 1.9                                                | 2                                                   | 1.05        |
| SP_1813 | N-(5'-phosphoribosyl)-anthranilate isomerase                                |              | 2                                                  | 1.8                                                 | 0.90        |

Up-regulated genes

| Locus   | Common name                            | Gene symbol | Fold change                                        |                                                     | Ratio Index |
|---------|----------------------------------------|-------------|----------------------------------------------------|-----------------------------------------------------|-------------|
|         |                                        |             | TIGR4 mock-infected/<br>TIGR4 in culture<br>medium | TIGR4 viral infected/<br>TIGR4 in culture<br>medium |             |
| SP_1814 | Indole-3-glycerol phosphate synthase   |             | 1.8                                                | 1.9                                                 | 1.06        |
| SP_1855 | Dehydrogenase                          |             | 6                                                  | 5.4                                                 | 0.90        |
| SP_1856 | Transcriptional regulator, MerR family |             | 7.6                                                | 6.8                                                 | 0.89        |
| SP_1857 | Cation efflux system protein           |             | 14.4                                               | 13.5                                                | 0.94        |
| SP_1922 | Conserved hypothetical protein         |             | 2.3                                                | 1.6                                                 | 0.70        |
| SP_1923 | Pneumolysin                            | <i>ply</i>  | 2.9                                                | 1.9                                                 | 0.66        |
| SP_1924 | Hypothetical protein                   |             | 2.6                                                | 1.7                                                 | 0.65        |
| SP_1925 | Hypothetical protein                   |             | 2.3                                                | 1.5                                                 | 0.65        |
| SP_2236 | Putative sensor histidine kinase ComD  | <i>comD</i> | 2.3                                                | 2                                                   | 0.87        |

Down-regulated genes

| Locus   | Common name                                                    | Gene symbol | Fold change                                        |                                                     | Ratio index |
|---------|----------------------------------------------------------------|-------------|----------------------------------------------------|-----------------------------------------------------|-------------|
|         |                                                                |             | TIGR4 mock-infected/<br>TIGR4 in culture<br>medium | TIGR4 viral infected/<br>TIGR4 in culture<br>medium |             |
| SP_0045 | Putative phosphoribosylformylglycinamide synthase              |             | 0.2                                                | 0.2                                                 | 1.00        |
| SP_0046 | Amidophosphoribosyltransferase                                 |             | 0.4                                                | 0.4                                                 | 1.00        |
| SP_0047 | Phosphoribosylformylglycinamide cyclo-ligase                   |             | 0.4                                                | 0.6                                                 | 1.50        |
| SP_0048 | Phosphoribosylglycinamide formyltransferase homolog (fragment) |             | 0.5                                                | 0.6                                                 | 1.20        |
| SP_0049 | VanZ protein, putative                                         | <i>vanZ</i> | 0.6                                                | 0.6                                                 | 1.00        |
| SP_0050 | Phosphoribosylaminoimidazolecarboxamide formyltransferase-imp  | <i>purH</i> | 0.5                                                | 0.5                                                 | 1.00        |

## Down-regulated genes

| Locus   | Common name                                                 | Gene symbol | Fold change                                        |                                                     | Ratio index |
|---------|-------------------------------------------------------------|-------------|----------------------------------------------------|-----------------------------------------------------|-------------|
|         |                                                             |             | TIGR4 mock-infected/<br>TIGR4 in culture<br>medium | TIGR4 viral infected/<br>TIGR4 in culture<br>medium |             |
|         | cyclohydrolase                                              |             |                                                    |                                                     |             |
| SP_0051 | Phosphoribosylamine glycine ligase                          |             | 0.3                                                | 0.3                                                 | 1.00        |
| SP_0053 | Phosphoribosylaminoimidazole carboxylase, catalytic subunit | <i>purE</i> | 0.4                                                | 0.4                                                 | 1.00        |
| SP_0054 | PurK protein (fragment).                                    | <i>purK</i> | 0.4                                                | 0.5                                                 | 1.25        |
| SP_0083 | DNA-binding response regulator                              |             | 0.5                                                | 0.5                                                 | 1.00        |
| SP_0084 | Sensor histidine kinase                                     |             | 0.4                                                | 0.4                                                 | 1.00        |
| SP_0095 | Conserved hypothetical protein                              |             | 0.2                                                | 0.4                                                 | 2.00        |
| SP_0267 | N5,n10-methylenetetrahydromethanopterin reductase, putative |             | 0.3                                                | 0.4                                                 | 1.33        |
| SP_0285 | Alcohol dehydrogenase, zinc-containing                      |             | 0.4                                                | 0.3                                                 | 0.75        |
| SP_0287 | Xanthine-uracil permease family protein                     |             | 0.2                                                | 0.3                                                 | 1.50        |
| SP_0288 | Conserved hypothetical protein                              |             | 0.4                                                | 0.4                                                 | 1.00        |
| SP_0289 | Dihydropteroate synthase                                    |             | 0.5                                                | 0.7                                                 | 1.40        |
| SP_0290 | Dihydrofolate synthetase                                    |             | 0.7                                                | 0.7                                                 | 1.00        |
| SP_0291 | Gtp cyclohydrolase I                                        |             | 0.7                                                | 0.8                                                 | 1.14        |
| SP_0292 | Bifunctional folate synthesis protein                       |             | 0.6                                                | 0.8                                                 | 1.33        |
| SP_0330 | RegR                                                        | <i>regR</i> | 0.5                                                | 0.4                                                 | 0.80        |
| SP_0726 | ThiD                                                        | <i>thiD</i> | 0.3                                                | 0.3                                                 | 1.00        |
| SP_0730 | Pyruvate oxidase                                            | <i>spxB</i> | 0.3                                                | 0.4                                                 | 1.33        |
| SP_0766 | Manganese superoxide dismutase.                             |             | 0.3                                                | 0.4                                                 | 1.33        |
| SP_0784 | Glutathione reductase                                       |             | 0.1                                                | 0.1                                                 | 1.00        |
| SP_0820 | ATP-dependent Clp protease, ATP-binding subunit ClpE        | <i>clpE</i> | 0.4                                                | 0.4                                                 | 1.00        |
| SP_0867 | ABC transporter, ATP-binding protein                        |             | 0.3                                                | 0.4                                                 | 1.33        |

## Down-regulated genes

| Locus   | Common name                                            | Gene symbol | Fold change                                        |                                                     | Ratio index |
|---------|--------------------------------------------------------|-------------|----------------------------------------------------|-----------------------------------------------------|-------------|
|         |                                                        |             | TIGR4 mock-infected/<br>TIGR4 in culture<br>medium | TIGR4 viral infected/<br>TIGR4 in culture<br>medium |             |
| SP_0868 | Conserved hypothetical protein                         |             | 0.3                                                | 0.3                                                 | 1.00        |
| SP_0869 | YurW protein                                           | <i>yurW</i> | 0.3                                                | 0.3                                                 | 1.00        |
| SP_0870 | Hypothetical protein                                   |             | 0.3                                                | 0.4                                                 | 1.33        |
| SP_0871 | YurU protein                                           | <i>yurU</i> | 0.3                                                | 0.3                                                 | 1.00        |
| SP_0999 | Cytochrome c-type biogenesis protein CcdA              | <i>ccdA</i> | 0.3                                                | 0.2                                                 | 0.67        |
| SP_1000 | Hypothetical protein                                   |             | 0.2                                                | 0.2                                                 | 1.00        |
| SP_1045 | Conserved hypothetical protein                         |             | 0.4                                                | 0.5                                                 | 1.25        |
| SP_1227 | Response regulator                                     |             | 0.5                                                | 0.5                                                 | 1.00        |
| SP_1228 | YfhQ protein                                           | <i>yfhQ</i> | 0.3                                                | 0.4                                                 | 1.33        |
| SP_1229 | Formate tetrahydrofolate ligase                        |             | 0.3                                                | 0.4                                                 | 1.33        |
| SP_1499 | Bacterocin transport accessory protein                 | <i>bta</i>  | 0.2                                                | 0.2                                                 | 1.00        |
| SP_1546 | Hypothetical protein                                   |             | 0.1                                                | 0.1                                                 | 1.00        |
| SP_1587 | Oxalate-formate antiporter                             |             | 0.2                                                | 0.2                                                 | 1.00        |
| SP_1588 | Oxidoreductase, pyridine nucleotide-disulfide, class I |             | 0.1                                                | 0.1                                                 | 1.00        |
| SP_1651 | Thiol peroxidase                                       | <i>psaD</i> | 0.3                                                | 0.3                                                 | 1.00        |
| SP_1774 | Transcriptional regulator, putative                    |             | 0.5                                                | 0.5                                                 | 1.00        |
| SP_1775 | Hypothetical protein                                   |             | 0.2                                                | 0.2                                                 | 1.00        |
| SP_1776 | Thioredoxin reductase                                  | <i>trxA</i> | 0.2                                                | 0.2                                                 | 1.00        |
| SP_1778 | Water channel protein                                  |             | 0.5                                                | 0.4                                                 | 0.80        |
| SP_1845 | Exodeoxyribonuclease                                   | <i>exoA</i> | 0.4                                                | 0.4                                                 | 1.00        |
| SP_1846 | Conserved hypothetical protein, degenerate             |             | 0.4                                                | 0.4                                                 | 1.00        |
| SP_1848 | Xanthine permease                                      |             | 0.3                                                | 0.4                                                 | 1.33        |

Down-regulated genes

| Locus   | Common name                                          | Gene symbol  | Fold change                                        |                                                     | Ratio index |
|---------|------------------------------------------------------|--------------|----------------------------------------------------|-----------------------------------------------------|-------------|
|         |                                                      |              | TIGR4 mock-infected/<br>TIGR4 in culture<br>medium | TIGR4 viral infected/<br>TIGR4 in culture<br>medium |             |
| SP_1860 | Choline transporter                                  | <i>proWX</i> | 0.2                                                | 0.2                                                 | 1.00        |
| SP_1861 | Choline transporter                                  | <i>proV</i>  | 0.2                                                | 0.2                                                 | 1.00        |
| SP_1862 | Hypothetical protein                                 |              | 0.2                                                | 0.2                                                 | 1.00        |
| SP_1907 | Cochaperonin groES.                                  |              | 0.4                                                | 0.5                                                 | 1.25        |
| SP_1946 | Putative transcriptional regulator PlcR              | <i>plcR</i>  | 0.4                                                | 0.5                                                 | 1.25        |
| SP_2054 | Hypothetical protein                                 |              | 0.3                                                | 0.3                                                 | 1.00        |
| SP_2055 | Alcohol dehydrogenase, zinc-containing               |              | 0.3                                                | 0.3                                                 | 1.00        |
| SP_2136 | PcpA                                                 | <i>pcpA</i>  | 0.5                                                | 0.4                                                 | 0.80        |
| SP_2187 | Hypothetical protein                                 |              | 0.3                                                | 0.4                                                 | 1.33        |
| SP_2188 | Hypothetical protein                                 |              | 0.5                                                | 0.5                                                 | 1.00        |
| SP_2197 | ABC transporter, substrate-binding protein, putative |              | 0.4                                                | 0.5                                                 | 1.25        |
| SP_2198 | ABC transporter, permease protein                    |              | 0.5                                                | 0.4                                                 | 0.80        |
| SP_2199 | Hypothetical protein                                 |              | 0.4                                                | 0.5                                                 | 1.25        |



**Figure S1 Correlation of the Log<sub>2</sub> ratios of TIGR4 adherent to mock-infected cells (y-axis) and TIGR4 adherent to HPIV3-infected cells (x-axis) of the commonly regulated genes.** The axes are the log<sub>2</sub> ratios for pneumococcal transcription when exposed to HPIV3-infected cells (x-axis) or uninfected cells (y-axis).

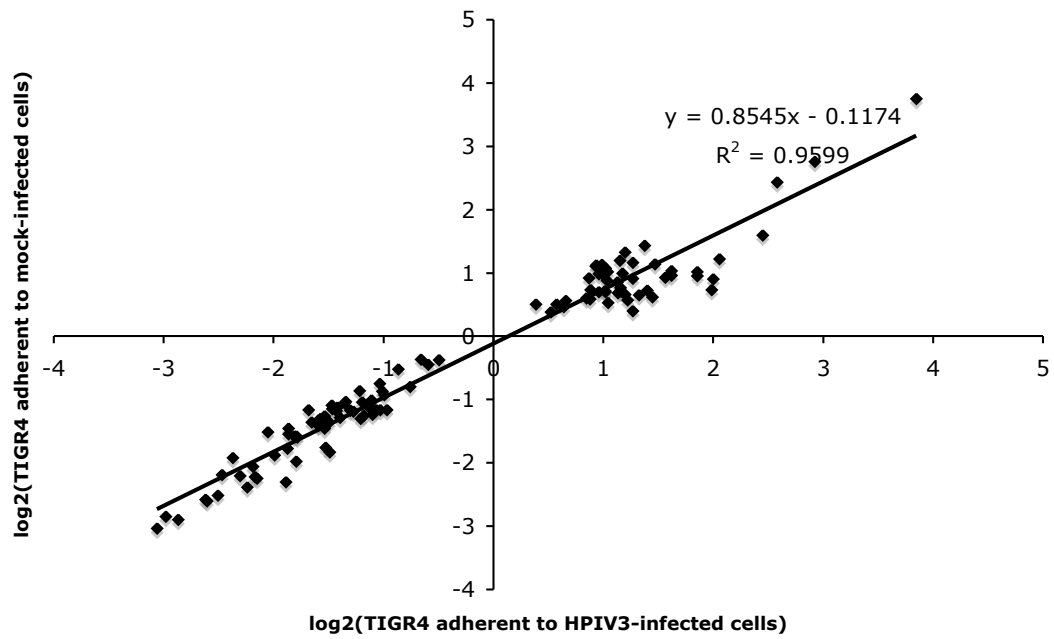

**Figure S2 qRT-PCR validation of microarray results.** All graphs display  $\log_2$  of microarray data on the X axis and  $\log_2$  of qRT-PCR data on the Y axis. A. TIGR4 genes regulated upon adherence to mock-infected D562 cells ( $R=0.84$ ); B. TIGR4 genes regulated upon adherence to HPIV3-infected D562 cells ( $R=0.92$ ); C. Human genes regulated upon infection of D562 cells with HPIV3 ( $R=0.87$ ); D. Human genes regulated upon infection of D562 cells with RSV ( $R=0.65$ ).

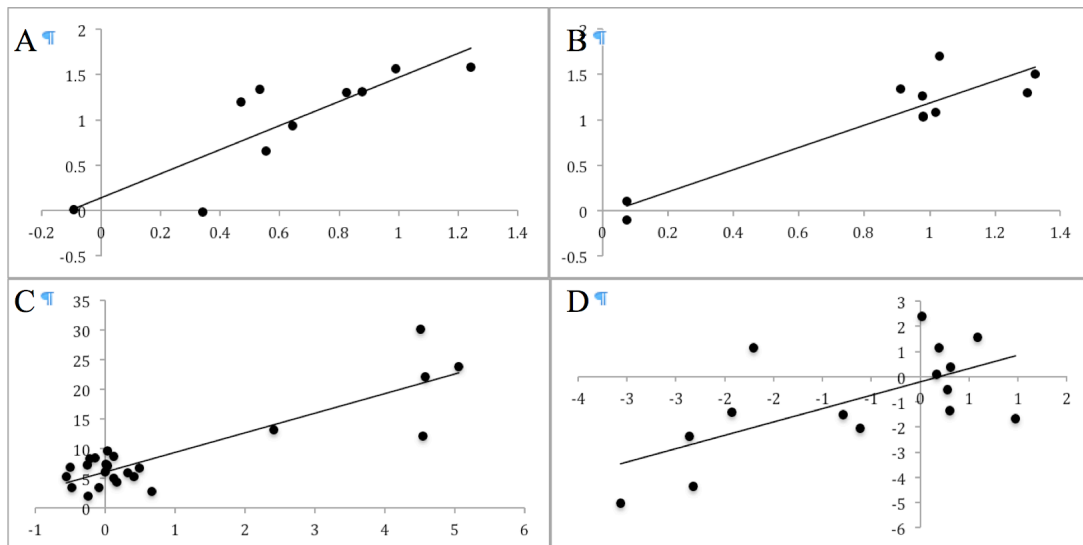

Supplement: 1471-2164-14-378-S1.pdf [file 1471-2164-14-378-S1.pdf]
